# Supplementary material for: Effect of Intensive Interdisciplinary Transitional Care for High-Need, High-Cost Patients on Quality, Outcomes, and Costs: a Quasi-Experimental Study
Source: Springer Nature journal article supplement (doi:10.1007/s11606-019-05082-8), 2019-07-03
Supplement: MOESM1 [file 16878972]

**Title: Effect of Intensive Interdisciplinary Transitional Care for High-Need, High-Cost Patients on Quality, Outcomes, and Costs: A Quasi-experimental Study**

**Appendix 1.** Methods

***Algorithm to identify controls that met the SafeMed Program inclusion and exclusion criteria***

Inclusion Criteria:

Step 1: We selected patients in Medicare and/or Medicaid dataset with one or more inpatient discharge date(s) between 2/1/13 and 6/30/2015.

Step 2: We selected all patients in Medicare and/or Medicaid dataset with > 1 eligible chronic condition diagnoses found at any time(s) between 2011 and 2015.

Step 3: We identified the earliest qualifying 6-month patient-period for each patient for which the inpatient discharge date associated with the last admission in the period occurred between 2/1/2013 and 6/30/2015. The 6-month patient-period was selected based on the following inclusion criteria:

1. > 3 inpatient admission dates within the 6-month period (including the last admission date in the period [aka the index admission date]); OR,
2. Two inpatient admission dates within the 6-month period AND > 2 ED admission dates not associated with a hospitalization within the 6-month period (i.e. No hospital admission date should be present on same day or day after ED visit) occurring in the period before the last (index) inpatient admission;

This last inpatient discharge date associated with the qualifying baseline 6-month period served as the index discharge date for cases and controls. For cases, we confirmed that they met the same inclusion criteria as controls for the 6-month period prior to their index admission. We only included in the analysis cases with an algorithm-generated index discharge date that matched their actual index discharge date following SafeMed Program enrollment.

Exclusion Criteria:

We excluded patients if the primary reason for index hospitalization was related to cancer, pregnancy, or a surgical procedure for an acute problem, or who had diagnoses of active psychosis, drug abuse, substance abuse, or suicidal ideation during the index admission, or discharge to another location other than home. We used the International Classification of Diseases, Ninth Revision, Clinical Modification [ICD-9-CM codes] and diagnosis-related group (DRG) codes for inclusion and exclusion criteria.

**Appendix 2.** Defining Medicare and Medicaid costs

For Medicare, costs were defined as sum of Medicare payments for inpatient admissions, ED visits, outpatient visits, physician office visits, prescription medications, home health care, and durable medical equipment. For Medicaid, costs were defined as sum of Medicaid payments for the same categories, plus laboratory claims, mental health, home and community-based services, and transportation.

**Appendix Table 1**. Ambulatory Care Sensitive Chronic Conditions Targeted by the SafeMed Program

| **Conditions** | **Included ICD-9 Diagnosis Codes** |
| --- | --- |
| Congestive heart failure | 493.00, 493.01, 493.02, 493.10, 493.11, 493.12, 493.20, 493.21, 493.22, 493.81, 493.82, 493.90, 493.91, 493.92, 490, 491.0, 491.1, 491.20, 491.21, 491.22, 491.8, 491.9, 492.0, 492.8, 494.0, 494.1, 496 |
| Hypertension | 362.11, 401.0, 401.1, 401.9, 402.00, 402.01, 402.10, 402.11, 402.90, 402.91, 403.00, 403.01, 403.10, 403.11, 403.90, 403.91, 404.00, 404.01, 404.02, 404.03, 404.10, 404.11, 404.12, 404.13, 404.90, 404.91, 404.92, 404.93, 405.01, 405.09, 405.11, 405.19, 405.91, 405.99, 437.2 |
| Diabetes | 249.00, 249.01, 249.10, 249.11, 249.20, 249.21, 249.30, 249.31, 249.40, 249.41, 249.50, 249.51, 249.60, 249.61, 249.70, 249.71, 249.80, 249.81, 249.90, 249.91, 250.00, 250.01, 250.02, 250.03, 250.10, 250.11, 250.12, 250.13, 250.20, 250.21, 250.22, 250.23, 250.30, 250.31, 250.32, 250.33, 250.40, 250.41, 250.42, 250.43, 250.50, 250.51, 250.52, 250.53, 250.60, 250.61, 250.62, 250.63, 250.70, 250.71, 250.72, 250.73, 250.80, 250.81, 250.82, 250.83, 250.90, 250.91, 250.92, 250.93, 357.2, 362.01, 362.02, 366.41 |
| Coronary artery disease | 410.00, 410.01, 410.02, 410.10, 410.11, 410.12, 410.20, 410.21, 410.22, 410.30, 410.31, 410.32, 410.40, 410.41, 410.42, 410.50, 410.51, 410.52, 410.60, 410.61, 410.62, 410.70, 410.71, 410.72, 410.80, 410.81, 410.82, 410.90, 410.91, 410.92, 411.0, 411.1, 411.81, 411.89, 412, 413.0, 413.1, 413.9, 414.00, 414.01, 414.02, 414.03, 414.04, 414.05 |
| Chronic lung disease* | 493.00, 493.01, 493.02, 493.10, 493.11, 493.12, 493.20, 493.21, 493.22, 493.81, 493.82, 493.90, 493.91, 493.92, 490, 491.0, 491.1, 491.20, 491.21, 491.22, 491.8, 491.9, 492.0, 492.8, 494.0, 494.1, 496 |

* Chronic lung disease was defined to include both chronic obstructive pulmonary disease and asthma.

**Appendix Table 2**. Baseline Characteristics among SafeMed-Eligible Intervention and Control Patients by Insurance Type

| **Characteristics** | **Medicare Only**  **(N = 649)** | **Medicaid Only**  **(N = 663)** | **Dual Eligible**  **(N = 923)** | ***P* value for comparisonsa** |
| --- | --- | --- | --- | --- |
| Age, mean (SD) | 72.2 (11.2) | 48.2 (12.4) | 61.6 (15.7) | 1,2,3 |
| Female gender (%) | 49.3 | 60.8 | 59.8 | 1,3 |
| Race/Ethnicity  Non-Hispanic White  Non-Hispanic Black  Other/Hispanic | 51.0  47.9  1.1 | 11.0  65.5  23.5 | 18.8  78.9  2.3 | 1,2,3 |
| Comorbidity  Hypertension  Diabetes  Congestive heart failure  Coronary artery disease  Asthma  Chronic obstructive pulmonary disease  Depression/anxiety  Tobacco use disorder  End-stage renal disease  Charlson comorbidity index, mean (SD) | 97.7  58.5  61.3  67.3  23.1  43.3  30.4  19.1  21.3  5.5 (2.8) | 56.1  37.4  35.1  30.8  26.4  32.4  24.6  28.8  17.8  3.1 (1.7) | 95.2  65.6  65.1  55.2  29.0  40.6  33.8  29.0  34.0  5.4 (2.6) | 1,2  1,2,3  1,2  1,2,3  3  1,2  1,2  1,3  2,3  1,2 |

a Numbers indicate statistical significance for bivariate analyses employing chi-square and t-test for categorical and continuous variables respectively for the following comparisons: 1) between Medicare Only and Medicaid Only patients (p <0.05); 2) between Medicaid Only and dual eligible patients (p < 0.05); or 3) between Medicare Only and dual eligible patients (p < 0.05).

**Appendix Table 3.** Average Pre-Post Change in Health Care Quality and Major Outcomes in the SafeMed Intervention Group Compared to the Control Group

| **Measure** | **SafeMed Participants**  **Mean (S.D.)**  **(N = 285)** | | **Program Eligible Controls**  **Mean (S.D.)**  **(N = 1,950)** | | **Adjusted Difference (DID) SafeMed vs. Controlsa** | **P Valueb** |
| --- | --- | --- | --- | --- | --- | --- |
|  | **Pre-Period** | **Post-Period** | **Pre-Period** | **Post-Period** |  |  |
| **QUALITY** |  |  |  |  |  |  |
| **>1 PCP visits within 14 days of discharge (%) c** |  |  |  |  |  |  |
| Medicare only | 52.4% | 66.1% | 50.9% | 61.6% | 3.13 (-9.39 to 15.65) | .62 |
| Dual eligible | 46.4% | 59.5% | 49.8% | 56.4% | 5.47 (-4.10 to 15.04) | .26 |
| **Medication adherence (PDC ≥80%) d** |  |  |  |  |  |  |
| Medicare only | 33.3% | 22.2% | 47.9% | 38.7% | -17.51 (-80.60 to 250.77) | .79 |
| Dual eligible | 29.1% | 30.9% | 40.1% | 32.8% | 55.71 (-30.06 to 246.64) | .28 |
| **OUTCOMES** |  |  |  |  |  |  |
| **Preventable ED visits** |  |  |  |  |  |  |
| Medicare only | 0.2 (.6) | 0.2 (.6) | 0.1 (.3) | 0.1 (.3) | .01 (-.01 to .03) | .29 |
| Dual eligible | 0.6 (1.3) | 0.6 (1.3) | 0.2 (.7) | 0.2 (.7) | -.01 (-.04 to .01) | .29 |
| **Preventable hospitalizations** |  |  |  |  |  |  |
| Medicare only | 1.0 (1.1) | 1.0 (1.1) | 0.4 (.7) | 0.4 (.7) | -.00 (-.03 to .02) | .93 |
| Dual eligible | 1.6 (1.7) | 1.5 (1.7) | 0.5 (.9) | 0.5 (.9) | -.02 (-.06 to .02) | .27 |
| **Emergency visits (No.)** |  |  |  |  |  |  |
| Medicare only | 0.9 (1.6) | 0.6 (1.1) | 0.9 (1.4) | 0.7 (1.4) | -.09 (-.51 to .33) | .67 |
| Dual eligible | 1.8 (2.7) | 1.6 (2.8) | 1.8 (3.7) | 1.8 (3.9) | -.31 (-.81 to .18) | .21 |
| **Hospitalizations (No.)** |  |  |  |  |  |  |
| Medicare only | 2.8 (1.1) | 1.7 (1.4) | 3.0 (.4) | 1.8 (2.1) | .05 (-.51 to .60) | .83 |
| Dual eligible | 3.4 (2.2) | 2.1 (2.3) | 3.3 (1.2) | 2.1 (2.2) | -.30 (-.77 to .16) | .20 |
| **30-day readmissions** |  |  |  |  |  |  |
| Medicare only | 0.9 (.9) | 0.8 (1.2) | 1.1 (.7) | 1.0 (1.8) | -.10 (-.32 to .52) | .65 |
| Dual eligible | 1.4 (2.0) | 1.1 (1.9) | 1.2 (1.2) | 1.2 (1.9) | -.31 (-.65 to .03) | .08 |
| **Hospital days (No.)** |  |  |  |  |  |  |
| Medicare only | 11.8 (9.2) | 11.5 (18.2) | 16.2 (12.2) | 11.2 (17.6) | 5.13 (-.14 to 10.4) | .06 |
| Dual eligible | 14.3 (15.4) | 9.9 (17.1) | 16.9 (15.5) | 12.3 (18.6) | -2.12 (-6.65 to 2.41) | .36 |

a Multivariate difference-in-differences models were adjusted for age, race, gender, and insurance, end-stage renal disease, anxiety/depression, substance abuse, and Charlson Comorbidity Index.

b Statistical significance at *P* value <.05.
c Average utilization of ≥ 1 primary care visits within 14 days of each hospital discharge in the pre-period was compared with utilization of ≥ 1 primary care visits within 14 days of the index discharge.

d Medication adherence was measured in a sample of the overall population with available pharmacy claims data and continuous enrollment in Medicare Part D and/or Tennessee Medicaid (overall sample: SafeMed participants N=152; controls, N=970; Medicaid sample: SafeMed participants, N=79; controls, N=317) using the proportion of days covered (PDC), with PDC ≥80% defined as adherent. (44)

**Appendix Table 4**. Average Pre-Post Change in Health Care Costs in the SafeMed Intervention Group Compared to the Control Group

| **Measure** | **SafeMed Participants**  **Mean (S.D.)**  **(N = 285)** | | **Program Eligible Controls**  **Mean (S.D.)**  **(N = 2,043)** | | **Adjusted Difference (DID) SafeMed vs. Controlsa** | **P Valueb** |
| --- | --- | --- | --- | --- | --- | --- |
|  | **Pre-Period** | **Post-Period** | **Pre-Period** | **Post-Period** |  |  |
| Total Medicare Only Costsc ($) | 34,992 (26,955) | 34,702 (53,959) | 40,474 (25,541) | 34,291 (37347) | 504 (-12,717 to 13,726) | .07 |
| Total Dual Costsd | 36,480 (38,839) | 29,587 (37,931) | 42,425 (32,484) | 38,418 (39,672) | -8,188 ( -17,782 to 1,406) | .09 |

**a** Multivariate difference-in-differences models were adjusted for age, race, gender, and insurance, end-stage renal disease, anxiety/depression, substance abuse, and Charlson Comorbidity Index.

b Statistical significance at *P* value <.05.

c Sample, N=1,382.

d Sample, N=1,948.

**Appendix Table 5**. Baseline Characteristics of SafeMed Eligible Participants and Controls Before and After Matching

|  | **Before Matching** | | | | **After Matching** | | | |
| --- | --- | --- | --- | --- | --- | --- | --- | --- |
| **Characteristic** | **All**  **(N = 2,235)** | **SafeMed Group**  **(N = 285)** | **Control Group**  **(N = 1,950)** | ***P* Valuea** | **All**  **(N = 855)** | **SafeMed Group**  **(N = 285)** | **Control Group**  **(N = 570)** | ***P* Valuea** |
| Age (mean, SD) | 60.6 (16.4) | 57.0 (15.3) | 61.4 (16.5) | < .001 | 56.7 (15.9) | 56.9 (16.2) | 57.0 (15.3) | .69 |
| Female gender (%) | 57.1 | 60.7 | 56.7 | .18 | 57.8 | 61.0 | 57.8 | .22 |
| Race/Ethnicity  Non-Hispanic White  Non-Hispanic Black  Other/Hispanic | 25.9  65.9  8.2 | 13.0  75.4  11.6 | 27.7  64.5  7.7 | < .001 | 12.1  77.9  10.1 | 12.5  75.4  12.1 | 12.0  76.4  11.6 | .89 |
| Eligibility Status  Medicare Only  Medicaid Only  Dual eligible  End-Stage Renal Disease | 29.0  29.7  41.3  26.6 | 21.7  39.3  40.0  20.1 | 30.1  28.3  41.6  27.5 | <.001  .01 | 20.8  36.6  42.6  20.0 | 19.9  41.9  38.2  18.9 | 20.1  37.6  42.4  18.1 | .20  .68 |
| Comorbidity  Hypertension  Diabetes  Congestive heart failure  Coronary artery disease  Asthma  COPDb  Depression/anxiety  Tobacco use disorder  Charlson comorbidity index, mean (SD) | 84.3  55.2  55.1  51.5  26.5  39.0  30.1  26.1  4.7 (2.7) | 83.5  64.2  64.9  58.9  36.5  51.9  27.4  29.5  4.7 (2.5) | 84.5  53.9  53.7  50.4  25.1  37.1  30.5  25.6  4.7 (2.7) | .46  <.001  <.001  .05  <.001  <.001  .08  .50  .55 | 91.4  67.6  66.6  55.0  31.3  44.6  28.1  26.5  4.6 (2.7) | 91.2  68.8  69.5  56.8  35.3  48.9  26.3  25.6  4.6 (2.7) | 91.8  67.0  65.1  54.1  29.3  42.4  28.9  27.0  4.6 (2.6) | .71  .47  .07  .29  .01  .01  .25  .53  .98 |

a Statistical significance at *P* value <.05.

b COPD: chronic obstructive pulmonary disease.

**Appendix Table 6**. Average Pre-Post Change in Health Care Utilization in the SafeMed Intervention Group Compared to the Control Group in Matched Sample

| **Measure** | **SafeMed Participants**  **Mean (S.D.)**  **(N = 285)** | | **Program Eligible Controls**  **Mean (S.D.)**  **(N = 570)** | | **Adjusted Difference (DID) SafeMed vs. Controlsa** | **P Valueb** |
| --- | --- | --- | --- | --- | --- | --- |
|  | **Pre-Period** | **Post-Period** | **Pre-Period** | **Post-Period** |  |  |
| Emergency visits (No.) | 2.4 (3.1) | 1.8 (3.0) | 2.1 (3.8) | 2.2 (4.4) | -.72 (-1.17 to -.26) | **.002** |
| Hospitalizations (No.) | 3.4 (2.5) | 2.1 (2.5) | 3.2 (1.2) | 2.4 (3.0) | -0.61 (-1.03 to -.20) | **.004** |
| Hospital days (No.) | 13.0 (14.6) | 9.5 (17.6) | 15.5 (15.9) | 14.4 (35.1) | -5.18 (-9.08 to -1.29) | **.009** |
| 30-day hospital readmissions (No.) | 1.4 (2.4) | 1.2 (2.1) | 1.2 (1.3) | 1.6 (2.8) | -0.54 (-0.88 to -0.19) | **.002** |

**a** Multivariate difference-in-differences models were adjusted for age, race, gender, and insurance, end-stage renal disease, anxiety/depression, substance abuse, and Charlson Comorbidity Index.

b Statistical significance at P value <.05.

**Appendix Table 7**. Average Pre-Post Change in Expenditures in the SafeMed Intervention Group Compared to the Control Group in Matched Sample

| **Measure** | **SafeMed Particiapants**  **Mean (S.D.)**  **(N = 285)** | | **Program Eligible Controls**  **Mean (S.D.)**  **(N = 570)** | | **Adjusted Difference (DID) SafeMed vs. Controlsa** | **P Valueb** |
| --- | --- | --- | --- | --- | --- | --- |
|  | **Pre-Period** | **Post-Period** | **Pre-Period** | **Post-Period** |  |  |
| Total Medical Costsc ($) | 35,164 (34,982) | 28,447 (38,778) | 38,558 (32,472) | 36,685 (40,757) | -9,997 (-16,169. to -3,824) | **.002** |
| Total Medicaid Only Costsd ($) | 31,554 (34,291) | 21,769 (27,019) | 29,217 (29,870) | 31,269 (37,727) | -14,330 (-23,009 to -5,650) | **.001** |
| Total Medicare Only Costse ($) | 36,677 (28,348) | 36,188 (54,273) | 40,113 (21,062) | 37,217 (44,827) | -3,335 (-17,585 to 10,914) | .65 |
| Total Dual Costsf | 37,927 (38,553) | 31,002 (38,318) | 45,327 (36,947) | 40,786 (40,741) | -7,226 (-17,310 to 2,857) | .16 |

**a** Multivariate difference-in-differences models were adjusted for age, race, gender, and insurance, end-stage renal disease, anxiety/depression, substance abuse, and Charlson Comorbidity Index.

b Statistical significance at P value <.05.

c Sample, N=1,710. d Sample, N=626.

e Sample, N=356.

f Sample, N=728.

eReference

1. Choudhry NK, Shrank WH, Levin RL, et al. Measuring concurrent adherence to multiple related medications. *Am J Manag Care.* 2009;15(7):457-464.
